# Supplementary material for: Phylogeny of Parasitic Parabasalia and Free-Living Relatives Inferred from Conventional Markers vs. Rpb1, a Single-Copy Gene
Source: PubMed Central journal article supplement (PMC3111441; doi:10.1371/journal.pone.0020774), 2011-06-09
Supplement: pone.0020774.s001.pdf [file pone.0020774.s001.pdf]

## Supporting Information for:

**Phylogeny of parasitic Parabasalia and free-living relatives inferred from conventional markers vs. *Rpbl*, a single-copy gene**

(*PLOS One*, 2011. doi:10.1371/journal.pone.0020774)

**Shehre-Banoo Malik<sup>1,2\*§</sup>, Cynthia D. Brochu<sup>2</sup>, Ivana Bilic<sup>3</sup>, Jing Yuan<sup>2</sup>, Michael Hess<sup>3</sup>, John M. Logsdon Jr.<sup>2</sup>, and Jane M. Carlton<sup>1§</sup>**

<sup>1</sup> Department of Microbiology – Division of Medical Parasitology, New York University Langone Medical Center, New York NY, United States of America.

<sup>2</sup> Department of Biology – Roy J. Carver Center for Comparative Genomics, University of Iowa, Iowa City IA, United States of America.

<sup>3</sup> Department for Farm Animals and Veterinary Public Health – Clinic for Avian, Reptile and Fish Medicine, University of Veterinary Medicine, Vienna, Austria.

\* current address:

Department of Biochemistry and Molecular Biology – Center for Comparative Genomics and Evolutionary Bioinformatics, Dalhousie University, Halifax NS, Canada.

§ Corresponding Authors

E-mail addresses:

SBM: sbmalik@dal.ca

CDB: cindy-brochu@uiowa.edu

IB: Ivana.Bilic@vetmeduni.ac.at

JY: yuanjing2003@hotmail.com

MH: Michael.Hess@vetmeduni.ac.at

JML: john-logsdon@uiowa.edu

JMC: jane.carlton@nyumc.org

**Figure S1:** Alignment of Parabasalid Rpb1 proteins indicating conserved regions A-H (underlined), with 100% identical amino acid residues indicated in **bold**, conserved insertions **highlighted in grey**, and the  $\alpha$ -amanitin sensitive region highlighted by a black box. Dashes indicate gaps or missing data. Arrows indicate the positions of PCR primers. Amino acid positions are indicated numerically in parentheses.

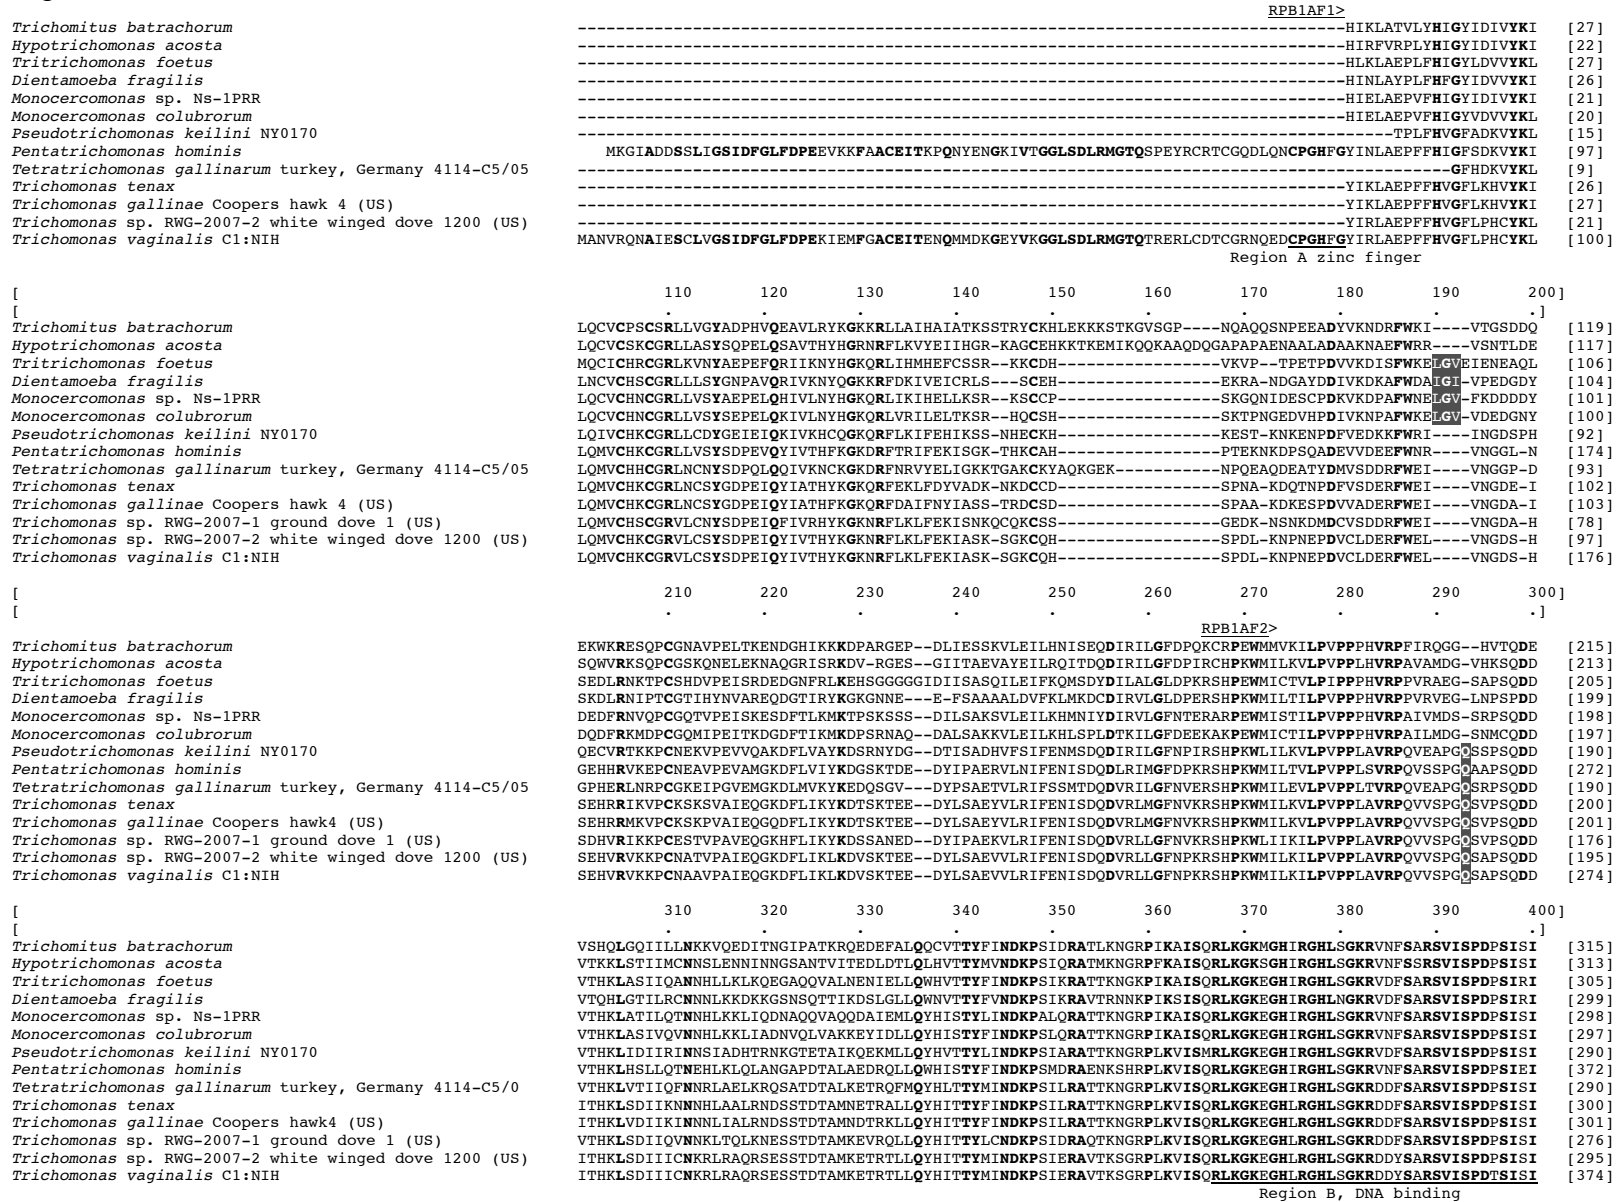

|                                                               |  |                                                                                                        |     |     |     |     |     |     |     |                     |                    |         |
|---------------------------------------------------------------|--|--------------------------------------------------------------------------------------------------------|-----|-----|-----|-----|-----|-----|-----|---------------------|--------------------|---------|
| [                                                             |  | 410                                                                                                    | 420 | 430 | 440 | 450 | 460 | 470 | 480 | 490                 | 500]               |         |
| [                                                             |  | .                                                                                                      | .   | .   | .   | .   | .   | .   | .   | .                   | .]                 |         |
|                                                               |  | <u>RPB1C2F&gt;</u>                                                                                     |     |     |     |     |     |     |     | <u>TVRPB1DF&gt;</u> | <u>RPB1C1F&gt;</u> |         |
| <i>Trichomitus batrachorum</i>                                |  | DQVGVPFELAKILTFPEVNSLNIKDMQQLVYNGPDSQDGAKAVITPLGARFSLGDTQESTVQHLVDYGSVVERHLRDNDDIVIFNRQPSLHKMSMMGHYAK  |     |     |     |     |     |     |     |                     |                    | [ 415 ] |
| <i>Hypotrichomonas acosta</i>                                 |  | DQVGVPQEIARILTFPEVVTARMLTEMQRVLYNGNEAQEGANVYITPQCTRINLAVTQESTAMQLDHDSDIVERHLRDDDDIVIFNRQPSLHKMSMMGHRAR |     |     |     |     |     |     |     |                     |                    | [ 413 ] |
| <i>Trichomonas foetus</i>                                     |  | DQVGVPQEIARILTFPEVVTARMLTEMQRVLYNGNEAQEGANVYITPQCTRINLAVTQESTAMQLDHDSDIVERHLRDDDDIVIFNRQPSLHKMSMMGHRAR |     |     |     |     |     |     |     |                     |                    | [ 405 ] |
| <i>Dientamoeba fragilis</i>                                   |  | DQVGVPKHAKILTFPEVVTARNDRELYRLVQNGPDELQGANFVINPQGRFSLRSTTERTTTTHLDDGSIVERHLQDNDIVIFNRQPSLHKMSMMGHAV     |     |     |     |     |     |     |     |                     |                    | [ 399 ] |
| <i>Monocercomonas sp.Ns1PRR</i>                               |  | DQVGVPLEIAKVLTFPEVVTARNDRELYRLVQNGPDAQGANVYITPQGRINLAVTEERSALHLADNAIVERHLRDDDDIVIFNRQPSLHKMSMMGHRAR    |     |     |     |     |     |     |     |                     |                    | [ 398 ] |
| <i>Monocercomonas colubrorum</i>                              |  | DQVGVPLEIAKVLTFPEVVTARNDRELYRLVQNGPDAQGANVYITPQGRINLAVTEERSALHLADNAIVERHLRDDDDIVIFNRQPSLHKMSMMGHRAR    |     |     |     |     |     |     |     |                     |                    | [ 397 ] |
| <i>Pseudotrichomonas keilini NY1070</i>                       |  | DQVGVPKELAKILTFPEVVTARNDRELYRLVQNGPDAQGANVYITPQGRINLAVTEERSALHLADNAIVERHLRDDDDIVIFNRQPSLHKMSMMGHRAR    |     |     |     |     |     |     |     |                     |                    | [ 390 ] |
| <i>Pentatrichomonas hominis</i>                               |  | DQVGVPKELAKILTFPEVVTARNDRELYRLVQNGPDAQGANVYITPQGRINLAVTEERSALHLADNAIVERHLRDDDDIVIFNRQPSLHKMSMMGHRAR    |     |     |     |     |     |     |     |                     |                    | [ 472 ] |
| <i>Tetratrichomonas gallinarum turkey, Germany 4114-C5/05</i> |  | DQVGVPKELAKILTFPEVVTARNDRELYRLVQNGPDAQGANVYITPQGRINLAVTEERSALHLADNAIVERHLRDDDDIVIFNRQPSLHKMSMMGHRAR    |     |     |     |     |     |     |     |                     |                    | [ 390 ] |
| <i>Trichomonas tenax</i>                                      |  | DQVGVPKELAKILTFPEVVTARNDRELYRLVQNGPDAQGANVYITPQGRINLAVTEERSALHLADNAIVERHLRDDDDIVIFNRQPSLHKMSMMGHRAR    |     |     |     |     |     |     |     |                     |                    | [ 400 ] |
| <i>Trichomonas gallinae Coopers hawk 4 (US)</i>               |  | DQVGVPKELAKILTFPEVVTARNDRELYRLVQNGPDAQGANVYITPQGRINLAVTEERSALHLADNAIVERHLRDDDDIVIFNRQPSLHKMSMMGHRAR    |     |     |     |     |     |     |     |                     |                    | [ 401 ] |
| <i>Trichomonas sp. RWG-2007-1 ground dove 1 (US)</i>          |  | DQVGVPKELAKILTFPEVVTARNDRELYRLVQNGPDAQGANVYITPQGRINLAVTEERSALHLADNAIVERHLRDDDDIVIFNRQPSLHKMSMMGHRAR    |     |     |     |     |     |     |     |                     |                    | [ 376 ] |
| <i>Trichomonas sp. RWG-2007-2 white winged dove 1200 (US)</i> |  | DQVGVPKELAKILTFPEVVTARNDRELYRLVQNGPDAQGANVYITPQGRINLAVTEERSALHLADNAIVERHLRDDDDIVIFNRQPSLHKMSMMGHRAR    |     |     |     |     |     |     |     |                     |                    | [ 395 ] |
| <i>Trichomonas vaginalis Cl:NIH</i>                           |  | DQVGVPKELAKILTFPEVVTARNDRELYRLVQNGPDAQGANVYITPQGRINLAVTEERSALHLADNAIVERHLRDDDDIVIFNRQPSLHKMSMMGHRAR    |     |     |     |     |     |     |     |                     |                    | [ 474 ] |

Region C

|                                                               |  |                                                                                                     |     |     |     |     |     |     |     |     |      |         |
|---------------------------------------------------------------|--|-----------------------------------------------------------------------------------------------------|-----|-----|-----|-----|-----|-----|-----|-----|------|---------|
| [                                                             |  | 510                                                                                                 | 520 | 530 | 540 | 550 | 560 | 570 | 580 | 590 | 600] |         |
| [                                                             |  | .                                                                                                   | .   | .   | .   | .   | .   | .   | .   | .   | .]   |         |
|                                                               |  | <u>RPB1DF&gt;RPB1DF2&gt;&lt;TVRPB1DR</u>                                                            |     |     |     |     |     |     |     |     |      |         |
| <i>Trichomitus batrachorum</i>                                |  | LIRGQSFRLNLCVTPPYNADFQDGMNHLVVPQQTARAEVKHIMAVPYQIITPQSNKPIIGLVQDCLVGCRLLSIRDFTFLTRNELMNLMMWIMDTKPDV |     |     |     |     |     |     |     |     |      | [ 515 ] |
| <i>Hypotrichomonas acosta</i>                                 |  | LIRGQSFRLNLCVTPPYNADFQDGMNHLVVPQQTARAEVKHIMAVPYQIITPQSNKPIIGLVQDCLVGCRLLSIRDFTFLTRNELMNLMMWIMDTKPDV |     |     |     |     |     |     |     |     |      | [ 512 ] |
| <i>Trichomonas foetus</i>                                     |  | LIRGQSFRLNLCVTPPYNADFQDGMNHLVVPQQTARAEVKHIMAVPYQIITPQSNKPIIGLVQDCLVGCRLLSIRDFTFLTRNELMNLMMWIMDTKPDV |     |     |     |     |     |     |     |     |      | [ 504 ] |
| <i>Dientamoeba fragilis</i>                                   |  | LIRGQSFRLNLCVTPPYNADFQDGMNHLVVPQQTARAEVKHIMAVPYQIITPQSNKPIIGLVQDCLVGCRLLSIRDFTFLTRNELMNLMMWIMDTKPDV |     |     |     |     |     |     |     |     |      | [ 431 ] |
| <i>Monocercomonas sp. Ns-1PRR</i>                             |  | LIRGQSFRLNLCVTPPYNADFQDGMNHLVVPQQTARAEVKHIMAVPYQIITPQSNKPIIGLVQDCLVGCRLLSIRDFTFLTRNELMNLMMWIMDTKPDV |     |     |     |     |     |     |     |     |      | [ 496 ] |
| <i>Monocercomonas colubrorum</i>                              |  | LIRGQSFRLNLCVTPPYNADFQDGMNHLVVPQQTARAEVKHIMAVPYQIITPQSNKPIIGLVQDCLVGCRLLSIRDFTFLTRNELMNLMMWIMDTKPDV |     |     |     |     |     |     |     |     |      | [ 495 ] |
| <i>Monotrichomonas carabina</i>                               |  | LIRGQSFRLNLCVTPPYNADFQDGMNHLVVPQQTARAEVKHIMAVPYQIITPQSNKPIIGLVQDCLVGCRLLSIRDFTFLTRNELMNLMMWIMDTKPDV |     |     |     |     |     |     |     |     |      | [ 73 ]  |
| <i>Pseudotrichomonas keilini NY1070</i>                       |  | LIRGQSFRLNLCVTPPYNADFQDGMNHLVVPQQTARAEVKHIMAVPYQIITPQSNKPIIGLVQDCLVGCRLLSIRDFTFLTRNELMNLMMWIMDTKPDV |     |     |     |     |     |     |     |     |      | [ 422 ] |
| <i>Pentatrichomonas hominis</i>                               |  | LIRGQSFRLNLCVTPPYNADFQDGMNHLVVPQQTARAEVKHIMAVPYQIITPQSNKPIIGLVQDCLVGCRLLSIRDFTFLTRNELMNLMMWIMDTKPDV |     |     |     |     |     |     |     |     |      | [ 571 ] |
| <i>Tetratrichomonas gallinarum turkey Germany 4114-C5/05</i>  |  | LIRGQSFRLNLCVTPPYNADFQDGMNHLVVPQQTARAEVKHIMAVPYQIITPQSNKPIIGLVQDCLVGCRLLSIRDFTFLTRNELMNLMMWIMDTKPDV |     |     |     |     |     |     |     |     |      | [ 404 ] |
| <i>Trichomonas tenax</i>                                      |  | LIRGQSFRLNLCVTPPYNADFQDGMNHLVVPQQTARAEVKHIMAVPYQIITPQSNKPIIGLVQDCLVGCRLLSIRDFTFLTRNELMNLMMWIMDTKPDV |     |     |     |     |     |     |     |     |      | [ 499 ] |
| <i>Trichomonas gallinae Coopers hawk 4 (US)</i>               |  | LIRGQSFRLNLCVTPPYNADFQDGMNHLVVPQQTARAEVKHIMAVPYQIITPQSNKPIIGLVQDCLVGCRLLSIRDFTFLTRNELMNLMMWIMDTKPDV |     |     |     |     |     |     |     |     |      | [ 500 ] |
| <i>Trichomonas sp. RWG-2007-1 ground dove 1 (US)</i>          |  | LIRGQSFRLNLCVTPPYNADFQDGMNHLVVPQQTARAEVKHIMAVPYQIITPQSNKPIIGLVQDCLVGCRLLSIRDFTFLTRNELMNLMMWIMDTKPDV |     |     |     |     |     |     |     |     |      | [ 475 ] |
| <i>Trichomonas sp. RWG-2007-2 white winged dove 1200 (US)</i> |  | LIRGQSFRLNLCVTPPYNADFQDGMNHLVVPQQTARAEVKHIMAVPYQIITPQSNKPIIGLVQDCLVGCRLLSIRDFTFLTRNELMNLMMWIMDTKPDV |     |     |     |     |     |     |     |     |      | [ 494 ] |
| <i>Trichomonas vaginalis Cl:NIH</i>                           |  | LIRGQSFRLNLCVTPPYNADFQDGMNHLVVPQQTARAEVKHIMAVPYQIITPQSNKPIIGLVQDCLVGCRLLSIRDFTFLTRNELMNLMMWIMDTKPDV |     |     |     |     |     |     |     |     |      | [ 573 ] |

Region D, Mg++ binding

|                                                               |  |                                                                                                        |     |     |     |     |     |     |     |     |      |         |
|---------------------------------------------------------------|--|--------------------------------------------------------------------------------------------------------|-----|-----|-----|-----|-----|-----|-----|-----|------|---------|
| [                                                             |  | 610                                                                                                    | 620 | 630 | 640 | 650 | 660 | 670 | 680 | 690 | 700] |         |
| [                                                             |  | .                                                                                                      | .   | .   | .   | .   | .   | .   | .   | .   | .]   |         |
| <i>Trichomitus batrachorum</i>                                |  | LPPPCIVAP---QELWSGKQVFSFLFPKINLDKFS--SPADDKGAD-KSNWSDDVVRVIRRDGHLLAGIIDSKTVAKSEGSLTHVIVINSYSLDTAKAFPLN |     |     |     |     |     |     |     |     |      | [ 609 ] |
| <i>Hypotrichomonas acosta</i>                                 |  | LPPPCIVAP---QELWSGKQVFSFLFPKINLDKFS--SPADDKGAD-KSNWSDDVVRVIRRDGHLLAGIIDSKTVAKSEGSLTHVIVINSYSLDTAKAFPLN |     |     |     |     |     |     |     |     |      | [ 609 ] |
| <i>Trichomonas foetus</i>                                     |  | LPPPCIVAP---QELWSGKQVFSFLFPKINLDKFS--SPADDKGAD-KSNWSDDVVRVIRRDGHLLAGIIDSKTVAKSEGSLTHVIVINSYSLDTAKAFPLN |     |     |     |     |     |     |     |     |      | [ 598 ] |
| <i>Monocercomonas sp. Ns-1PRR</i>                             |  | LPPPCIVAP---QELWSGKQVFSFLFPKINLDKFS--SPADDKGAD-KSNWSDDVVRVIRRDGHLLAGIIDSKTVAKSEGSLTHVIVINSYSLDTAKAFPLN |     |     |     |     |     |     |     |     |      | [ 586 ] |
| <i>Monocercomonas colubrorum</i>                              |  | LPPPCIVAP---QELWSGKQVFSFLFPKINLDKFS--SPADDKGAD-KSNWSDDVVRVIRRDGHLLAGIIDSKTVAKSEGSLTHVIVINSYSLDTAKAFPLN |     |     |     |     |     |     |     |     |      | [ 585 ] |
| <i>Monotrichomonas carabina</i>                               |  | LPPPCIVAP---QELWSGKQVFSFLFPKINLDKFS--SPADDKGAD-KSNWSDDVVRVIRRDGHLLAGIIDSKTVAKSEGSLTHVIVINSYSLDTAKAFPLN |     |     |     |     |     |     |     |     |      | [ 168 ] |
| <i>Pentatrichomonas hominis</i>                               |  | LPPPCIVAP---QELWSGKQVFSFLFPKINLDKFS--SPADDKGAD-KSNWSDDVVRVIRRDGHLLAGIIDSKTVAKSEGSLTHVIVINSYSLDTAKAFPLN |     |     |     |     |     |     |     |     |      | [ 666 ] |
| <i>Trichomonas tenax</i>                                      |  | LPPPCIVAP---QELWSGKQVFSFLFPKINLDKFS--SPADDKGAD-KSNWSDDVVRVIRRDGHLLAGIIDSKTVAKSEGSLTHVIVINSYSLDTAKAFPLN |     |     |     |     |     |     |     |     |      | [ 591 ] |
| <i>Trichomonas gallinae Coopers hawk 4 (US)</i>               |  | LPPPCIVAP---QELWSGKQVFSFLFPKINLDKFS--SPADDKGAD-KSNWSDDVVRVIRRDGHLLAGIIDSKTVAKSEGSLTHVIVINSYSLDTAKAFPLN |     |     |     |     |     |     |     |     |      | [ 593 ] |
| <i>Trichomonas sp. RWG-2007-1 ground dove 1 (US)</i>          |  | LPPPCIVAP---QELWSGKQVFSFLFPKINLDKFS--SPADDKGAD-KSNWSDDVVRVIRRDGHLLAGIIDSKTVAKSEGSLTHVIVINSYSLDTAKAFPLN |     |     |     |     |     |     |     |     |      | [ 567 ] |
| <i>Trichomonas sp. RWG-2007-2 white winged dove 1200 (US)</i> |  | LPPPCIVAP---QELWSGKQVFSFLFPKINLDKFS--SPADDKGAD-KSNWSDDVVRVIRRDGHLLAGIIDSKTVAKSEGSLTHVIVINSYSLDTAKAFPLN |     |     |     |     |     |     |     |     |      | [ 586 ] |
| <i>Trichomonas vaginalis Cl:NIH</i>                           |  | LPPPCIVAP---QELWSGKQVFSFLFPKINLDKFS--SPADDKGAD-KSNWSDDVVRVIRRDGHLLAGIIDSKTVAKSEGSLTHVIVINSYSLDTAKAFPLN |     |     |     |     |     |     |     |     |      | [ 665 ] |

|                                                               |  |                                                                                                    |     |     |     |     |     |     |     |     |      |         |
|---------------------------------------------------------------|--|----------------------------------------------------------------------------------------------------|-----|-----|-----|-----|-----|-----|-----|-----|------|---------|
| [                                                             |  | 710                                                                                                | 720 | 730 | 740 | 750 | 760 | 770 | 780 | 790 | 800] |         |
| [                                                             |  | .                                                                                                  | .   | .   | .   | .   | .   | .   | .   | .   | .]   |         |
| <i>Trichomitus batrachorum</i>                                |  | QTQLVNNWLEHRGFSIGLSDCLAYEKTLDDVSDQIHQLKRNVDLIDQAKHGKLETPPGLTFMEGFESEKINKLLNDLINDTGATVQKASRFWNSLMQM |     |     |     |     |     |     |     |     |      | [ 708 ] |
| <i>Hypotrichomonas acosta</i>                                 |  | QTQLVNNWLEHRGFSIGLSDCLAYEKTLDDVSDQIHQLKRNVDLIDQAKHGKLETPPGLTFMEGFESEKINKLLNDLINDTGATVQKASRFWNSLMQM |     |     |     |     |     |     |     |     |      | [ 708 ] |
| <i>Trichomonas foetus</i>                                     |  | QTQLVNNWLEHRGFSIGLSDCLAYEKTLDDVSDQIHQLKRNVDLIDQAKHGKLETPPGLTFMEGFESEKINKLLNDLINDTGATVQKASRFWNSLMQM |     |     |     |     |     |     |     |     |      | [ 697 ] |
| <i>Monocercomonas sp. Ns-1PRR</i>                             |  | QTQLVNNWLEHRGFSIGLSDCLAYEKTLDDVSDQIHQLKRNVDLIDQAKHGKLETPPGLTFMEGFESEKINKLLNDLINDTGATVQKASRFWNSLMQM |     |     |     |     |     |     |     |     |      | [ 685 ] |
| <i>Monocercomonas colubrorum</i>                              |  | QTQLVNNWLEHRGFSIGLSDCLAYEKTLDDVSDQIHQLKRNVDLIDQAKHGKLETPPGLTFMEGFESEKINKLLNDLINDTGATVQKASRFWNSLMQM |     |     |     |     |     |     |     |     |      | [ 684 ] |
| <i>Monotrichomonas carabina</i>                               |  | QTQLVNNWLEHRGFSIGLSDCLAYEKTLDDVSDQIHQLKRNVDLIDQAKHGKLETPPGLTFMEGFESEKINKLLNDLINDTGATVQKASRFWNSLMQM |     |     |     |     |     |     |     |     |      | [ 268 ] |
| <i>Pentatrichomonas hominis</i>                               |  | QTQLVNNWLEHRGFSIGLSDCLAYEKTLDDVSDQIHQLKRNVDLIDQAKHGKLETPPGLTFMEGFESEKINKLLNDLINDTGATVQKASRFWNSLMQM |     |     |     |     |     |     |     |     |      | [ 765 ] |
| <i>Trichomonas tenax</i>                                      |  | QTQLVNNWLEHRGFSIGLSDCLAYEKTLDDVSDQIHQLKRNVDLIDQAKHGKLETPPGLTFMEGFESEKINKLLNDLINDTGATVQKASRFWNSLMQM |     |     |     |     |     |     |     |     |      | [ 690 ] |
| <i>Trichomonas gallinae Coopers hawk 4 (US)</i>               |  | QTQLVNNWLEHRGFSIGLSDCLAYEKTLDDVSDQIHQLKRNVDLIDQAKHGKLETPPGLTFMEGFESEKINKLLNDLINDTGATVQKASRFWNSLMQM |     |     |     |     |     |     |     |     |      | [ 692 ] |
| <i>Trichomonas sp. RWG-2007-1 ground dove 1 (US)</i>          |  | QTQLVNNWLEHRGFSIGLSDCLAYEKTLDDVSDQIHQLKRNVDLIDQAKHGKLETPPGLTFMEGFESEKINKLLNDLINDTGATVQKASRFWNSLMQM |     |     |     |     |     |     |     |     |      | [ 666 ] |
| <i>Trichomonas sp. RWG-2007-2 white winged dove 1200 (US)</i> |  | QTQLVNNWLEHRGFSIGLSDCLAYEKTLDDVSDQIHQLKRNVDLIDQAKHGKLETPPGLTFMEGFESEKINKLLNDLINDTGATVQKASRFWNSLMQM |     |     |     |     |     |     |     |     |      | [ 685 ] |
| <i>Trichomonas vaginalis Cl:NIH</i>                           |  | QTQLVNNWLEHRGFSIGLSDCLAYEKTLDDVSDQIHQLKRNVDLIDQAKHGKLETPPGLTFMEGFESEKINKLLNDLINDTGATVQKASRFWNSLMQM |     |     |     |     |     |     |     |     |      | [ 764 ] |

[ 810 820 830 840 850 860 870 880 890 900 ]  
[ . . . . . ]  
Trichomitus batrachorum MQAGSKGSKVNIAQIIACVGGQSI EGERVRFGFKNRTLPHYVKDDFDLESRGFVEHSYIQGLTPOEFFFHSMGGRTGI IDTACKTADTGYIQRRLCKTME [808]  
Hypotrichomonas acosta VAAGSKGSLNINISQIIAVVQQNVEGKRIRYGFKGRTLPHYVKDDFDLECRGFCHEHSYIQGLTPOEFFFHSMGGRTGI IDTACKTADTGYIQRRLCKSME [808]  
Tritrichomonas foetus VAAGSKGSLNINISQIIATVQQNIEGKRIRYGFKGRTLPHYVKDDFDLGLESRGFCHEHSYIQGLTPOEFFFHSMGGRTGI IDTACKTADTGYIQRRLCKSME [797]  
Monocercomonas sp. Ns-1PRR VAAGSKGSLNINISQIIACVQQNVEGKRVPNGFKNRTLPHYFKDDVGLKAEAGFCHEHSYIQGLTPOEFFFHSMGGRTGI IDTACKTADTGYIQRRLCKSME [785]  
Monocercomonas colubrorum VAAGSKGSLNINISQIIACVQQNVEGKRVPNGFKNRTLPHYFKDDVGLKAEAGFCHEHSYIQGLTPOEFFFHSMGGRTGI IDTACKTADTGYIQRRLCKSME [784]  
Monotrichomonas carabina VNAGSKGSKNINISQIIACVQQNVEGKRIRYGFKGRTLPHYTKDDGLSESRGFVMSYIIGLTPAEFFHSMGGREGITDACKTADTGYIQRRLCKAME [786]  
Pentatrichomonas hominis NMAGSKGADNSISQIIASVQQNMEGKRVRFGFKNRTLPHYQKHYGLVERGFCHEHSYIIEGLTPEFFLPHAMGGRTGI IDTACKTADTGYIQRRLCKSME [865]  
Trichomonas tenax LTAGSKGADNFVTVIGVVAQQNIEGKRVRFGFKNRTLPHYQKHYGLVPRGFCHEHSYIIEGLTPEFFLPHAMGGRTGI IDTACKTADTGYIQRRLCKSME [790]  
Trichomonas gallinae Coopers hawk 4 (US) LTAGSKGADNFVTVIGVVAQQNIEGKRVRFGFKNRTLPHYQKHYGLVPRGFCHEHSYIIEGLTPEFFLPHAMGGRTGI IDTACKTADTGYIQRRLCKSME [792]  
Trichomonas sp. RWG-2007-1 ground dove 1 (US) LSAGSKGADNSISQIIIGVQQNMEGKRVRFGFKNRTLPHYQKHYGLVPRGFCVNSYIAGLTPPEFLPHAMGGRTGI IDTACKTADTGYIQRRLCKSME [766]  
Trichomonas sp. RWG-2007-2 white winged dove 1200 (US) LSAGSKGADNTMSQIIIGVQQNMEGKRVRFGFKNRTLPHYQKHYGLVERGFCVNSYIAGLTPPEFLPHAMGGRTGI IDTACKTADTGYIQRRLCKSME [785]  
Trichomonas vaginalis Cl:NIH LSAGSKGADNTMSQIIIGVQQNMEGKRVRFGFKNRTLPHYQKHYGLVERGFCVNSYIAGLTPPEFLPHAMGGRTGI IDTACKTADTGYIQRRLCKSME [864]  
Region E alpha aamtin sensitive/resistant; Translocation Region F

[ 910 920 930 940 950 960 970 980 990 1000 ]  
[ . . . . . ]  
Trichomitus batrachorum SHCVYDGTVRDSMNNVQFLYGGDIDPVQIETQSLSLIALSDQEFDSMYKMNINDPVFGAGYLESSIIISDLRKMEGTPTTTITGNFGGRSEEVEITRP [908]  
Hypotrichomonas acosta SHCVYDGTVRNSLNEIVQFIYGGDLEPPKLETKQCPLEISLDRVDFRVMENDPFVGVGKIQRDIIENLRS-----DVRS [887]  
Tritrichomonas foetus SHCVYDGTVRNSLNEIVQFIYGGDLDPVGLETONLTFMGDSDEDFDRKFRPDLTQAFFGQGMQDQIIVDELMS-----NPNHT [877]  
Monocercomonas sp. Ns-1PRR SHCVYDGTIRNSLNEIVQFLYGGDMDPICLETKQIRLLSMDNDQFRNEYEFDLISLPTFGQGMNADTIDEMNE-----NISAT [865]  
Monocercomonas colubrorum SHCVYDGTVRNSLNEIVQFIYGGDMDPICLETKQISIPLEMDNDEFREYFDLSLPTFGQGMIRQVEIDGMND-----NISAT [864]  
Monotrichomonas carabina SHQVAYDGTVRNSLNEIVQFIYGGADYDATSLETONVRLVNMDKAFRQINPHELDIDNADPFIQGMQHSIEELRN-----DPLA [447]  
Pentatrichomonas hominis SHHVAYDGTVRNSLNEIVQFIYGGDGLDATGLETONLRLSVMGDRFSEYEMVDDATFGQVMQRIIDVQN-----MQNR [944]  
Trichomonas tenax SHHVAYDGTVRNSLNEIVQFIYGGDGLDATGLETOFLNLVLDLKKFDQYHNMVDDPTFGSEAMDANILEEFLN-----TPGK [869]  
Trichomonas gallinae Coopers hawk 4 (US) SHHVAYDGTVRNSLNEIVQFIYGGDGLDATGLETOQLRLVLDVDCDDTKFKYHYLSPEDFLPFGTDCMDSNVLDEFLN-----TPGK [871]  
Trichomonas sp. RWG-2007-1 ground dove 1 (US) SHHVAYDGTVRNSLNEIVQFIYGGDGLDATGLETOQLRLVLDVLDKAFNKLHYLNVDDPTFGQDAMDANVLEDFLR-----SMDK [845]  
Trichomonas sp. RWG-2007-2 white winged dove 1200 (US) SHHVAYDGTVRNSLNEIVQFIYGGDGLDATGLETOQLALVTLNDEKFMKKYHLASEDPTFGQVEMDDFVLDFLK-----TPNK [864]  
Trichomonas vaginalis Cl:NIH SHHVAYDGTVRNSLNEIVQFIYGGDGLDATGLETOQLALVTLNDEDFMKYHLATEDPTFGQVEMDDFVLDFLK-----TPNK [943]

[ 1010 1020 1030 1040 1050 1060 1070 1080 1090 1100 ]  
[ . . . . . ]  
Trichomitus batrachorum SAVLQEEIDLTLHFRQILREEIFPNNGQKLYASVNLKRIIETAQRKYNINEYTSLSLDNPNVLLVSEVKKLVSRLLIIVQQNKDKIGREVQNGTLLLRLLI [1008]  
Hypotrichomonas acosta QERLQAEKTRLDPRDLRTEIFPNNGDSVITLRSKVRQLIDTSKTVDHINEHTNINSLNLPYFVIDEVDKLAQLVVPVGD-DPIGREAQDNATLLMRILQ [986]  
Tritrichomonas foetus KNRLDHEINRLKFRQILREEIFPDASNKVWLVPVNIIRLLIESAQSHHINPHESKSNLNPVTVIOKVEELVDQVIVKGE-DALSREAQDNATLLLRHII [976]  
Monocercomonas sp. Ns-1PRR RTILNARETERLRLKFRQILREEIFPSGEGSVLFPVNIIRLLETAQQTGCHINPHSDKSDLHPINVIESVENIKLVVVPGD-DVYSKEAQDNATLLLRHII [964]  
Monocercomonas colubrorum KDVLQKEIARLKHFRILREEVFPATGSGVYLPVNIIGRLIQAQQIHNINPHSDRDLHPIHVDSVEKLVSKLIVVKG-DYIQKEAQDNATLLLRVLL [963]  
Monotrichomonas carabina RDILNISEINLGSALRKLREEVFTDAKNRVALINISRLLETARNMNYINEYVSIISDLRPLDVIKRVEEKIQSLIVVQGN-DRI SRKAQDNATLLMRALM [946]  
Pentatrichomonas hominis HDVLSNIEKRLQDRLQQLQTEIFLKGESKVVLPVNIITRIIQTSQQMQGGINVHSKSNLNDPVIIRRVDEKIRSLIVVKG-DIAIVTAQDNATLLLRIML [1043]  
Trichomonas tenax EKKLQDETRLKEFRELQTEIFPPGNTKVVLPVNIINISRIESSQRQFQINPHASISDLNPLDVIAKQVDCVNSLTIIVKGN-DSISLRAQDNATLLLRKIML [968]  
Trichomonas gallinae Coopers hawk 4 (US) ENRKLHEENRLEFRLEILQTEIFPPGNTKVVLPVNIIRLLETSQRQFQINPHASISDLNPLDVISRVEECANSLTIIVKGN-DSISRTAQDNATLLLRKIML [970]  
Trichomonas sp. RWG-2007-1 ground dove 1 (US) DKKLQEEHRLKEFRELQTEIFPPGSDTVVLPVNIARIIESSQRQFQINPHASISDLNPLDIARVDECVNSLTIIVKGN-DTISRRAQDNATLLLRIML [943]  
Trichomonas sp. RWG-2007-2 white winged dove 1200 (US) DKFLKEEENRLEFRLEILQTEIFPPGNSNTVLPVNIARIIESSQRQFQINPHASISDLNPLDIISRVEECVNSLTIIVKGN-DNISRTAQDNATLLLRIML [964]  
Trichomonas vaginalis Cl:NIH DKFLKEEENRLEFRLEILQTEIFPPGNSNTVLPVNIARIIESSQRQFQINPHASISDLNPLDIISRVEECVNSLTIIVKGN-DNISRTAQDNATLLLRIML [1042]

[ 1110 1120 1130 1140 1150 1160 1170 1180 1190 1200 ]  
[ . . . . . ]  
Trichomitus batrachorum <RPB1GR2 <RPB1GR1  
HATLASKPLIEKNRSLQAFRSIIIEIEDRFYRTIVSPGEMVGTIAGQSIGEPATQ----- [1070]  
Hypotrichomonas acosta YTLASKPLILKERLSMDAFKWIIEIEERFPETIVAPGEMVGTIAGQSIGEPSTQ----- [1048]  
Tritrichomonas foetus FSNLASKPVIFQHRLTEQALIFVLGKTRFVQTVSPGEMVGTIAGQSIGEPSTQMTLNTFFHAGVSAKNVTLGVPRLNEVMNLA RVMKTPQVTVVLEP [1076]  
Monocercomonas sp. Ns-1PRR YSNLAAKTLIFKYLRLNEIAFKYVVLGEVEVAFVKSIVSPGEMVGTIAGQSIGEPATQ----- [1026]  
Monocercomonas colubrorum YSNLAAKTLIFKYLRLNEIAFKYVVLGEVEVAFVKSIVSPGEMVGTIAGQSIGEPATQ----- [1025]  
Monotrichomonas carabina YSNLAAKTLIFKYLRLNEIAFKYVVLGEVEVAFVKSIVSPGEMVGTIAGQSIGEPATQ----- [596]  
Pentatrichomonas hominis YSNLAAKQIFKYLRLNEIAFKYVVLGEVEVAFVKSIVSPGEMVGTIAGQSIGEPSTQMTLNTFFHAGISAKDVTLGVPRLNEIMNLAQIKTPCVTVILDY [1143]  
Trichomonas tenax YSNLAAKQVIFKYLRLNEIAFKYVVLGEVEVAFVKSIVSPGEMVGTIAGQSIGEPSTQ----- [1022]  
Trichomonas gallinae Coopers hawk 4 (US) FSNLAAKQVIFKYLRLNEIAFKYVVLGEVEVAFVKSIVSPGEMVGTIAGQSIGEPSTQ----- [1029]  
Trichomonas sp. RWG-2007-1 ground dove 1 (US) FSNLAAKQVIFKYLRLNEIAFKYVVLGEVEVAFVKSIVSPGEMVGTIAGQSIGEPSTQ----- [998]  
Trichomonas sp. RWG-2007-2 white winged dove 1200 (US) YSNLAAKQVIFKYLRLNEIAFKYVVLGEVEVAFVKSIVSPGEMVGTIAGQSIGEPSTQ----- [1026]  
Trichomonas vaginalis Cl:NIH YSNLAAKQVIFKYLRLNEIAFKYVVLGEVEVAFVKSIVSPGEMVGTIAGQSIGEPSTQMTLNTFFHAGISAHVDVTLGVPRLNEIMNLAQIKTPCVTVIFEFR [1142]  
Region G, elongation, TFIIS binding

Tritrichomonas foetus DSRG-----DKDKAKDIAQEALESSLKKLV-ARSEIYDPSDMNSMIEE-DEWARYQ--GRED----SSNLSPVWLRLV [1141]  
Pentatrichomonas hominis NSNNQDDGSDMDDEEDRSVRQKQELDAALAKDVRANVE-CAAFKFKVTKSEIFVDEPADNTTIDEDREWIGIY-INNQLDFN-IDNYSVWLRF [1240]  
Trichomonas vaginalis Cl:NIH DVAK-----DEEIVKAVRAQIE-SASFKKVFKAEIYYDPNPEETIIEPD-TKWINTRIRYGGVEDRELQDLAPVWLRF [1215]  
LNQAALVDKNINPIEIVEKINILYANVYAIITNEGSSGDP IIRIRGLMNDKSFEDKGRALQFAEQHLYDLSLKGIEGINRAVMEETTRYEVDPNESAF [1241]  
LDVKSLLASVNSLPIEQRAIENSYSSELFSVIFEGNMANAASSFPPIRIRPTKSLVQKNGKTDESEFFLREIEQQLYDERAISIKGIPGIRRVKIDQKA [1340]  
INRE-EMIASNIIESISDIIVQKIKMGYDKFVFIIGDDARIIRMQRALRDKQAEFAMDVKFLRETEQQMYKSPFLTKGIPGISRVKINSAAEKMFLPNETHG [1314]

Tritrichomonas foetus NTERKECKHEWVLYTEGSALREVLNHPVDCR-----RSVSNINILETLEILGIEAAROSILI----- [1299]  
Pentatrichomonas hominis KRKVLDEEDH-HWVKSDDPQLITETGALKAILGLDHDIDKLYTNDINIEYDVLGIEAARNLSLCEMMIMDAGASLNRRLDLDLADTMQYGRLYPVSR [1439]  
Trichomonas vaginalis Cl:NIH FDKEVSKL-YTEGTAFREILSLDHVDTV-----HTITNDIYQVCDVLGIEAARHSLSYEMMLIMEKAGAAALNRRLDLDLADTMQYGVLYPVSR [1403]  
Region H
