# Supplementary material for: Phylogeny of Parasitic Parabasalia and Free-Living Relatives Inferred from Conventional Markers vs. Rpb1, a Single-Copy Gene
Source: PubMed Central journal article supplement (PMC3111441; doi:10.1371/journal.pone.0020774), 2011-06-09

## Supporting Information for:

**Phylogeny of parasitic Parabasalia and free-living relatives inferred from conventional markers vs. *Rpbl*, a single-copy gene**

(*PLOS One*, 2011. doi:10.1371/journal.pone.0020774)

**Shehre-Banoo Malik<sup>1,2\*§</sup>, Cynthia D. Brochu<sup>2</sup>, Ivana Bilic<sup>3</sup>, Jing Yuan<sup>2</sup>, Michael Hess<sup>3</sup>, John M. Logsdon Jr.<sup>2</sup>, and Jane M. Carlton<sup>1§</sup>**

<sup>1</sup> Department of Microbiology – Division of Medical Parasitology, New York University Langone Medical Center, New York NY, United States of America.

<sup>2</sup> Department of Biology – Roy J. Carver Center for Comparative Genomics, University of Iowa, Iowa City IA, United States of America.

<sup>3</sup> Department for Farm Animals and Veterinary Public Health – Clinic for Avian, Reptile and Fish Medicine, University of Veterinary Medicine, Vienna, Austria.

\* current address:

Department of Biochemistry and Molecular Biology – Center for Comparative Genomics and Evolutionary Bioinformatics, Dalhousie University, Halifax NS, Canada.

§ Corresponding Authors

E-mail addresses:

SBM: sbmalik@dal.ca

CDB: cindy-brochu@uiowa.edu

IB: Ivana.Bilic@vetmeduni.ac.at

JY: yuanjing2003@hotmail.com

MH: Michael.Hess@vetmeduni.ac.at

JML: john-logsdon@uiowa.edu

JMC: jane.carlton@nyumc.org

**Figure S2: Rooted eukaryotic Rpb1 phylogeny with constant sites removed recovers monophyletic Metamonada topology.**

New sequences from this study are indicated in bold type. This tree topology was calculated by RAxML 7.2.7 from 857 unambiguously aligned amino acids spanning conserved regions A to G of Rpb1, with constant sites removed. Thickened lines indicate the nodes supported by a Bayesian posterior probability of 1.00. Numbers at the nodes correspond to Bayesian posterior probabilities from the best post burn-in 1500 trees (chains run for  $2 \times 10^6$  generations), followed by percent bootstrap support  $\geq 50\%$  given by PhyML (100 replicates) and RAxML (1000 replicates). LnL = - 56091.16,  $\alpha = 1.33$ , pI= 0.0013. Scale bar represents 0.1 amino acid substitution per site. The alignment is provided in the **Supporting Information Dataset S8**. GenBank accession numbers, Joint Genome Institute or Broad Institute locus IDs are shown at the left for each taxon.

Figure S2

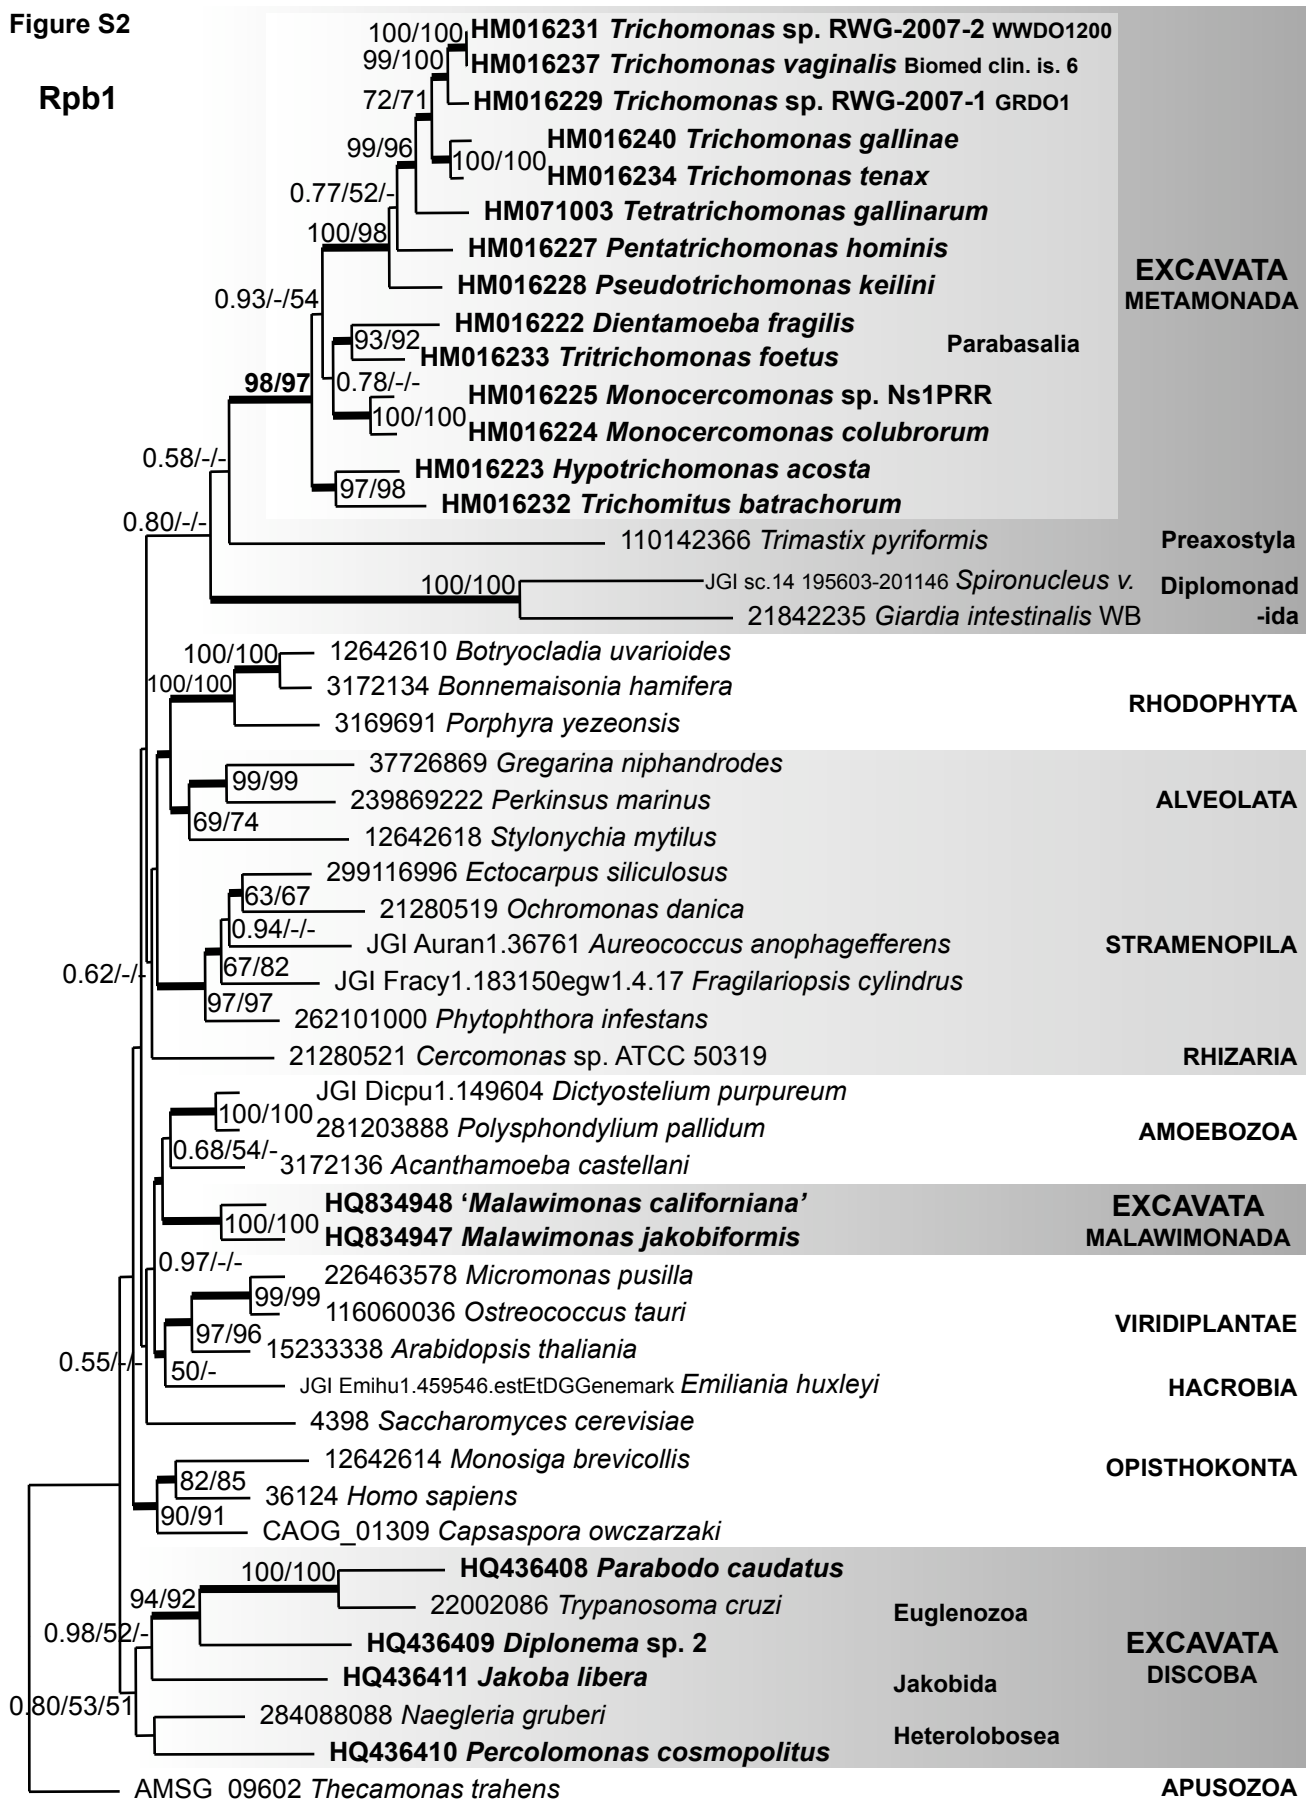

Supplement: pone.0020774.s002.pdf [file pone.0020774.s002.pdf]
