# Supplementary material for: Phylogeny of Parasitic Parabasalia and Free-Living Relatives Inferred from Conventional Markers vs. Rpb1, a Single-Copy Gene
Source: PubMed Central journal article supplement (PMC3111441; doi:10.1371/journal.pone.0020774), 2011-06-09

## Supporting Information for:

**Phylogeny of parasitic Parabasalia and free-living relatives inferred from conventional markers vs. *Rpbl*, a single-copy gene**

(*PLOS One*, 2011. doi:10.1371/journal.pone.0020774)

**Shehre-Banoo Malik<sup>1,2\*§</sup>, Cynthia D. Brochu<sup>2</sup>, Ivana Bilic<sup>3</sup>, Jing Yuan<sup>2</sup>, Michael Hess<sup>3</sup>, John M. Logsdon Jr.<sup>2</sup>, and Jane M. Carlton<sup>1§</sup>**

<sup>1</sup> Department of Microbiology – Division of Medical Parasitology, New York University Langone Medical Center, New York NY, United States of America.

<sup>2</sup> Department of Biology – Roy J. Carver Center for Comparative Genomics, University of Iowa, Iowa City IA, United States of America.

<sup>3</sup> Department for Farm Animals and Veterinary Public Health – Clinic for Avian, Reptile and Fish Medicine, University of Veterinary Medicine, Vienna, Austria.

\* current address:

Department of Biochemistry and Molecular Biology – Center for Comparative Genomics and Evolutionary Bioinformatics, Dalhousie University, Halifax NS, Canada.

§ Corresponding Authors

E-mail addresses:

SBM: sbmalik@dal.ca

CDB: cindy-brochu@uiowa.edu

IB: Ivana.Bilic@vetmeduni.ac.at

JY: yuanjing2003@hotmail.com

MH: Michael.Hess@vetmeduni.ac.at

JML: john-logsdon@uiowa.edu

JMC: jane.carlton@nyumc.org

**Figure S3: GAPDH phylogeny rooted with Preaxostyla and Bacteria does not resolve interrelationships of six parabasalid groups.**

This consensus topology of the 9500 best trees calculated by Bayesian inference was constructed from 254 unambiguously aligned amino acids, with constant sites removed.  $\text{LnL} = -8779.10$ ,  $\alpha = 1.52$  ( $1.25 < \alpha < 1.83$ ),  $\text{pI} = 0.0039$  ( $0.000094 < \text{pI} < 0.014$ ). Scale bar represents 0.1 amino acid substitution per site. Thickened lines indicate the nodes supported by a Bayesian posterior probability of 1.00. Numbers at the nodes correspond to Bayesian posterior probabilities, followed by percent bootstrap support  $\geq 50\%$  given by PhyML and RAxML (1000 replicates each). Data generated in this study is highlighted by bold type. The alignment is provided in the **Supporting Information Dataset S2**. Genbank accession numbers are shown at the left for each taxon.

Figure S3

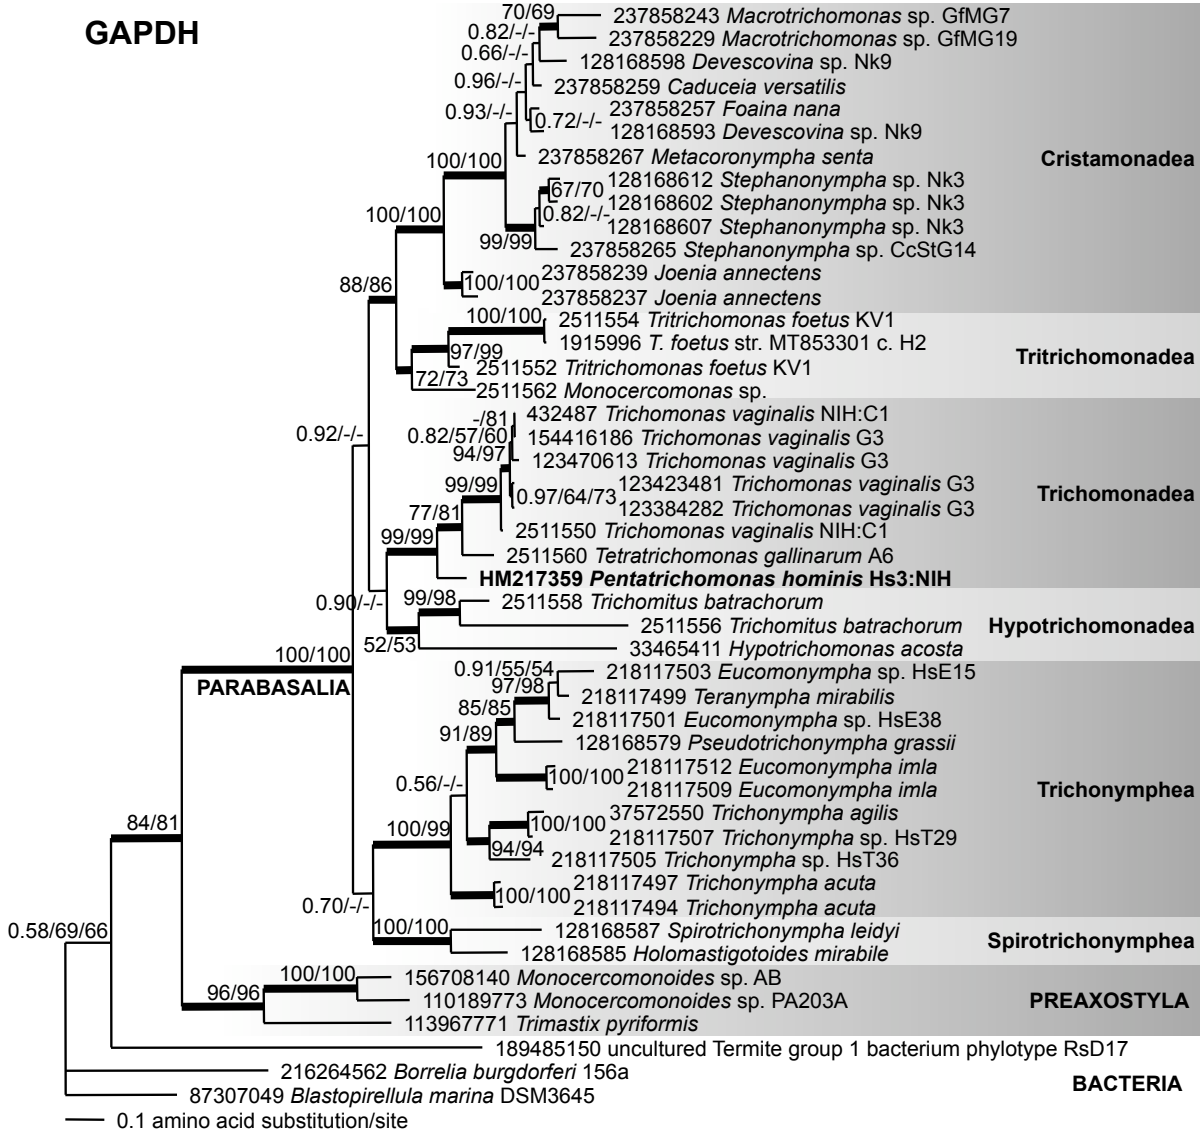

Supplement: pone.0020774.s003.pdf [file pone.0020774.s003.pdf]
