# Supplementary material for: Phylogeny of Parasitic Parabasalia and Free-Living Relatives Inferred from Conventional Markers vs. Rpb1, a Single-Copy Gene
Source: PubMed Central journal article supplement (PMC3111441; doi:10.1371/journal.pone.0020774), 2011-06-09
Supplement: pone.0020774.s004.pdf [file pone.0020774.s004.pdf]

## Supporting Information for:

**Phylogeny of parasitic Parabasalia and free-living relatives inferred from conventional markers vs. *Rpbl*, a single-copy gene**

(*PLOS One*, 2011. doi:10.1371/journal.pone.0020774)

**Shehre-Banoo Malik<sup>1,2\*§</sup>, Cynthia D. Brochu<sup>2</sup>, Ivana Bilic<sup>3</sup>, Jing Yuan<sup>2</sup>, Michael Hess<sup>3</sup>, John M. Logsdon Jr.<sup>2</sup>, and Jane M. Carlton<sup>1§</sup>**

<sup>1</sup> Department of Microbiology – Division of Medical Parasitology, New York University Langone Medical Center, New York NY, United States of America.

<sup>2</sup> Department of Biology – Roy J. Carver Center for Comparative Genomics, University of Iowa, Iowa City IA, United States of America.

<sup>3</sup> Department for Farm Animals and Veterinary Public Health – Clinic for Avian, Reptile and Fish Medicine, University of Veterinary Medicine, Vienna, Austria.

\* current address:

Department of Biochemistry and Molecular Biology – Center for Comparative Genomics and Evolutionary Bioinformatics, Dalhousie University, Halifax NS, Canada.

§ Corresponding Authors

E-mail addresses:

SBM: sbmalik@dal.ca

CDB: cindy-brochu@uiowa.edu

IB: Ivana.Bilic@vetmeduni.ac.at

JY: yuanjing2003@hotmail.com

MH: Michael.Hess@vetmeduni.ac.at

JML: john-logsdon@uiowa.edu

JMC: jane.carlton@nyumc.org

**Table S1:** Primers used to amplify and sequence fragments of parabasalid *Rpb1* genes, listed from 5' to 3' positions within the gene.

|                                                | Forward primer (5' – 3')          | Reverse primer (5' – 3') |
|------------------------------------------------|-----------------------------------|--------------------------|
| <b>General degenerate oligos</b>               |                                   |                          |
| Rpb1AF1 (ECPGHFG) [56]                         | GAGTGTCCAGGNCAYYTTYGG             |                          |
| Rpb1AF2 (SHPKWMI)                              | TCNCATCCARARTGGATGAT              |                          |
| Rpb1C2F (IDQVGVP)                              | ATMGAYCARGTNGGWGTTCC              |                          |
| Rpb1C1F (KMSMMGH)                              | AARATGTCTATGATGGGNAC              |                          |
| Rpb1DF (TPYNA)                                 | ACWACWCCWTAYAAAYGC                |                          |
| Rpb1DF2 (PYNADFDGDEM)                          | CCGTACAATGCAGAYTTYGAYGGNGAYGARATG |                          |
| Rpb1FR (FHAMGG)                                |                                   | CCAGCCATNGCRTGRAA        |
| Rpb1GR2 (PGEMVGT)                              |                                   | GTGCCGACCATYTCNCCNGG     |
| Rpb1GR1 (MTLNTFH) [56]                         |                                   | GTGGAACGTGTTNARNGTCAT    |
| <b><i>Trichomonas vaginalis</i></b>            |                                   |                          |
| TrichomonRpb1ASR1                              |                                   | ATGTATTGAATTTCTGGATC     |
| TvRpb1iF                                       | GAAGATTATTTATCCGCCG               |                          |
| TvRpb1iR                                       |                                   | GGGAGTATGAGTTGTGGG       |
| TvRpb1DF (IFNRQP)                              | CATTTTCAACCGTCAGCC                |                          |
| <b>TvRpb1DR (MNLHVPQ)</b>                      |                                   | TGTGGAACGTGAAGGTTTCAT    |
| TvB7Rpb1SFD2                                   | GCGCGATACATTCCTTAC                |                          |
| TvRpb1SF1                                      | ACTCCATTCTCTTGCGG                 |                          |
| TvRpb1SF2                                      | GGTAACCTCCTCGCTGG                 |                          |
| TvRpb1SF3                                      | GGTCTCATCGACTGCG                  |                          |
| TvRpb1GSF4                                     | TGATAACATCTCTCGTAC                |                          |
| TvRpb1SR1                                      |                                   | CATCGAGAACGAAATCGTCC     |
| <b><i>Trichomonas tenax</i></b>                |                                   |                          |
| TtxRpb1SF1                                     | GGATGTCAGACTCATGGGC               |                          |
| TtxRpb1SF2                                     | GCTGATTTCAACATCACACAGG            |                          |
| TtxRpb1SF3                                     |                                   |                          |
| TtxRpb1SF4                                     | GATCAATCGTCGCTCCAGG               |                          |
| TtxRpb1SR1                                     |                                   | CCGTTTGAATATGAGTCATATG   |
| TtxRpb1SR3 (GHLRGH)                            |                                   | GTGTCTCTCAAGTGACC        |
| TtxRpb1SR4                                     |                                   | GGGTGAATCACAGCAGTCC      |
| <b><i>Trichomonas</i> sp. RWG-2007-1 GRDO1</b> |                                   |                          |
| Tg393Rpb1ASF2                                  | TCCAACAAACAATGCC                  |                          |
| Tg393Rpb1CSR1                                  |                                   | CTGTTCTTGTACCACGATC      |
| Tg393Rpb1DSF1                                  | CTGTTGCTAGATCAGAAGG               |                          |
| Tg393Rpb1ESF3                                  | ATTCGGCTTTAGTGGTAG                |                          |
| Tg393Rpb1GSF4                                  | CAAGACGTGCTCAAGATAATGC            |                          |
| <b><i>Trichomonas gallinae</i></b>             |                                   |                          |
| Tg394Rpb1BSF1                                  | GGCCAAAGCGTCCCATCACAGG            |                          |
| Tg394Rpb1ESR1                                  |                                   | GCACCCTTCGAACCGGCAGTAAGC |
| Tg394Rpb1GSF2                                  | GCGCAGGAGAACGCCACGC               |                          |
| Tg8855C306Rpb1R4                               |                                   | GGGACTTTCATACGTCTGTG     |
| Tg8855C306Rpb1F2                               | GCTGAAAGTTATCTCACAGCGTC           |                          |

|                                          |                          |                          |
|------------------------------------------|--------------------------|--------------------------|
| Tg8855C306Rpb1R3                         |                          | GTCTTCGACTTCGTTAATCTTCTC |
| Tg8855C306Rpb1R2                         |                          | TGAGGAACTCGTCGAGTACG     |
| Tg8855C306Rpb1F3                         | AGAAACTCTCTCAACGAAGTTGTC |                          |
| Tg8855C306Rpb1F4                         | CGCGTGCTTCAATTTCCGAC     |                          |
| <b><i>Pentatrichomonas hominis</i></b>   |                          |                          |
| PhRpb1SF1 (DTGTKTD)                      | CAGATACGGGAACGAAGACCG    |                          |
| PhRpb1SF2                                | GCTGTGGTCAGGTAAGC        |                          |
| PhRpb1SF3                                | GGCGCACATCCGCCGCG        |                          |
| PhRpb1SR1 (TYFIND)                       |                          | ATCATTGATAAAGTATGT       |
| PhRpb1SR2                                |                          | CCTCGTCAGCTTGAGATGGG     |
| PhRpb1SR3                                |                          | CGACTTCCATCTCGTACTCCTC   |
| PhRpb1GSF1                               | CAAGCACAGGCTCGACG        |                          |
| <b><i>Pseudotriconomonas keilini</i></b> |                          |                          |
| PkRpb1ASR1                               |                          | GCATTCATGATTTGACGAC      |
| PkRpb1BSF1                               | GATCGCATCCCAAGTGG        |                          |
| PkRpb1DSF1                               | ATAGACAGCCATCACTCC       |                          |
| PkRpb1DSF2                               | GAGCTGTATTAATGAGTGG      |                          |
| <b><i>Tritrichomonas foetus</i></b>      |                          |                          |
| TfRpb1SF1 (SHPEWM)                       | TCGCATCCAGAATGGATG       |                          |
| TfRpb1SF2 (TDGDIV)                       | ACCGATGGTGATATTGTT       |                          |
| TfRpb1SF3                                | GGATACCTGTTGATGATACACG   |                          |
| TfRpb1SF4                                | GCACTTTCTAGAGAAGC        |                          |
| TfRpb1SR3                                |                          | GTGACCACGAATGTGTCC       |
| TfRpb1SR4                                |                          | GGTTAGGATTACTCATTAATTC   |
| <b><i>Dientamoeba fragilis</i></b>       |                          |                          |
| DfRpb1SF1 (PVPPPH)                       | CCAGTTCACCACCACACG       |                          |
| DfRpb1SF2 (SIVERH)                       | CTATCGTTGAGCGTCACC       |                          |
| DfRpb1DSF3                               | GTCACCATGCTGTGATTATGAG   |                          |
| DfRpb1ASR1                               |                          | GCTCGCATGATGATAAGCGGC    |
| DfRpb1SR1 (DDGSIV)                       |                          | CGATAGAGCCATCATCC        |
| <b><i>Trichomitus batrachorum</i></b>    |                          |                          |
| TbRpb1ASF1                               | GGACCCTGCGCGTGGAGAACCCG  |                          |
| TbRpb1ASR1                               |                          | TGCATGAATGGCCAGAAGAC     |
| TbRpb1CSR2                               |                          | CGATGGAGATCGAAGGATCGGG   |
| TbRpb1DSF2                               | ATGTCCATGATGGGGCACTATGC  |                          |
| TbRpb1GSR3                               |                          | CGATGATACGCTTCAGG        |
| TbRpb1GSF4                               | TTCATGCCACGCTCGCCTC      |                          |
| TbRpb1DSR4                               |                          | GTGTCCATAATCCACAT        |
| TbRpb1DSF5                               | TGGACACAAAGCCTGACC       |                          |
| TbRpb1ESF6                               | CGCTCACCGGTACATTTGAAGCG  |                          |
| TbRpb1FSR4                               |                          | CGCGAACGGTTCCGTCGTATTGG  |
| <b><i>Hypotriconomonas acosta</i></b>    |                          |                          |
| HaRpb1ASR1                               |                          | GGTAATGTGTGACAGCGC       |
| HaRpb1AF1                                | ATGCGGTCTGTTACTTGC       |                          |

|                                  |                           |                       |
|----------------------------------|---------------------------|-----------------------|
| HaRpb1CSR1                       |                           | CCTGTGGTGTAAATGACATAG |
| HaRpb1DSR1                       |                           | CCACATCATCAAGTTTG     |
| HaRpb1DSF1                       | CAATCGTCAACCATCTCTCC      |                       |
| HaRpb1FF1                        | CTCCTCCAGGTCTCACTTTTCATGG |                       |
| HaRpb1FR1                        |                           | TGCACAGTGGCACCAGT     |
| HaRpb1GSF1                       | GCCCAAGACAATGCAACTC       |                       |
| <hr/>                            |                           |                       |
| <i>Monocercomonas colubrorum</i> |                           |                       |
| McRpb1ASR1                       |                           | GATACAAGTAAACGGCCAC   |
| McRpb1BSF1                       | GGAGAAGATGTTTCATCCTG      |                       |
| McRpb1DSR1                       |                           | CTGGTCCATTATGGACAAGC  |
| McRpb1DSF1                       | GTAGAACGCCATCTCCGAG       |                       |
| McRpb1ESF1                       | GCCTGAAATTAACCATGATGG     |                       |
| McRpb1GSF1                       | GAAGCTCAAGATAATGCAAC      |                       |
| McRpb1GSR1                       |                           | CTGATCTATCAGAATGTGG   |
| <hr/>                            |                           |                       |
| <i>Monocercomonas sp.</i>        |                           |                       |
| MspRpb1ASF1                      | CAAAGTTAAAGATCCCGC        |                       |
| MspRpb1ASR1                      |                           | ATGAGCCTCTGCTTTCCATG  |
| MspRpb1DSR1                      |                           | GCTATCTCAAGTGGCACACC  |
| MspRpb1DF1                       | AAAATGTCTATGATGGGTC       |                       |
| MspRpb1ESF1                      | GCGCGATGTCGTTCTCCCACC     |                       |
| MspRpb1FSR1                      |                           | GTGAGTTACGAATAGTTCC   |
| MspRpb1GSR1                      |                           | CCTTGAAATGTAATCATC    |
| MspRpb1GSF1                      | GATGATTACATTCCAAGG        |                       |
| <hr/>                            |                           |                       |
| <i>Monotrichomonas carabina</i>  |                           |                       |
| MtRpb1DR1                        |                           | GAACCAAGCCGATGATTGG   |
| <hr/>                            |                           |                       |
