# Supplementary material for: Phylogeny of Parasitic Parabasalia and Free-Living Relatives Inferred from Conventional Markers vs. Rpb1, a Single-Copy Gene
Source: PubMed Central journal article supplement (PMC3111441; doi:10.1371/journal.pone.0020774), 2011-06-09
Supplement: pone.0020774.s005.pdf [file pone.0020774.s005.pdf]

## Supporting Information for:

**Phylogeny of parasitic Parabasalia and free-living relatives inferred from conventional markers vs. *Rpbl*, a single-copy gene**

(*PLOS One*, 2011. doi:10.1371/journal.pone.0020774)

**Shehre-Banoo Malik<sup>1,2\*§</sup>, Cynthia D. Brochu<sup>2</sup>, Ivana Bilic<sup>3</sup>, Jing Yuan<sup>2</sup>, Michael Hess<sup>3</sup>, John M. Logsdon Jr.<sup>2</sup>, and Jane M. Carlton<sup>1§</sup>**

<sup>1</sup> Department of Microbiology – Division of Medical Parasitology, New York University Langone Medical Center, New York NY, United States of America.

<sup>2</sup> Department of Biology – Roy J. Carver Center for Comparative Genomics, University of Iowa, Iowa City IA, United States of America.

<sup>3</sup> Department for Farm Animals and Veterinary Public Health – Clinic for Avian, Reptile and Fish Medicine, University of Veterinary Medicine, Vienna, Austria.

\* current address:

Department of Biochemistry and Molecular Biology – Center for Comparative Genomics and Evolutionary Bioinformatics, Dalhousie University, Halifax NS, Canada.

§ Corresponding Authors

E-mail addresses:

SBM: sbmalik@dal.ca

CDB: cindy-brochu@uiowa.edu

IB: Ivana.Bilic@vetmeduni.ac.at

JY: yuanjing2003@hotmail.com

MH: Michael.Hess@vetmeduni.ac.at

JML: john-logsdon@uiowa.edu

JMC: jane.carlton@nyumc.org

**Table S2:** Primers used to amplify and sequence fragments of *Parabodo caudatus*, *Diplonema* sp. 2, *Percolomonas cosmopolitus*, *Jakoba libera* and *Malawimonas Rpb1* genes, listed from 5' to 3' positions within the gene.

|                                         | Forward primer (5' – 3')  | Reverse primer (5' – 3') |
|-----------------------------------------|---------------------------|--------------------------|
| <b>General degenerate oligos</b>        |                           |                          |
| Rpb1AF1 (ECPGHFG) [56]                  | GAGTGTCCAGGNCA YTTYGG     |                          |
| Rpb1BF2 (RGNLMGK)                       | AGAGGTA ACTTRATGCNAA      |                          |
| Rpb1DF3 (PYNADFG)                       | CCGTACAATGCAGAYTTYGAYGG   |                          |
| Rpb1DF4 (ADFDGDEM)                      | GCAGACTTCGATGGNGAYGARATG  |                          |
| Rpb1EF5 (P(L/I)WTGKQ)                   | CCACTGTGGACNGGNAARCA      |                          |
| Rpb1DR7 (PYNADFD)                       |                           | GTCGAAGTCTGCRTTRTANGG    |
| Rpb1FR5 (FH(A/T)M(G/A)GRE)              |                           | ACGACCTGCCATNGYRTGRAA    |
| Rpb1GR2 (MTLNTFH) [56]                  |                           | GTGGAACGTGTTNARNGTCAT    |
| Rpb1GR9 (VTLGVPR)                       |                           | TCTAGGCACTCCGARNGTNAC    |
| <b><i>Parabodo caudatus</i></b>         |                           |                          |
| 37BodoRpb1R1                            |                           | CAAAGTACTTGTGCGAGGAAGAC  |
| <b><i>Diplonema</i> sp. 2</b>           |                           |                          |
| 34Rpb1F1                                | CTACACAGAATGAGTATGATGGG   |                          |
| 34Rpb1F2                                | TGTTCCCTTAATCAA ACTAGATCC |                          |
| 41Rpb1R1                                |                           | GTTGACCGCTTTGTGAGCAGATG  |
| <b><i>Percolomonas cosmopolitus</i></b> |                           |                          |
| PerRpb1F1                               | GGTCAACAGAATATTGAAGG      |                          |
| PerRpb1F2                               | AGACGATGGTTGTTGGTGG       |                          |
| PerRpb1R1                               |                           | AGTGCATCTTGACGATAGC      |
| PerRpb1R2                               |                           | GCTCACCACGACTGATGACG     |
| PerRpb1R3                               |                           | TCAACGGATGTCCCATCTTTGTG  |
| <b><i>Jakoba libera</i></b>             |                           |                          |
| 28Rpb1F0                                | TTGCTGAACCCGCTCATGTCA     |                          |
| 28Rpb1F1                                | CATTTCCGCCAGGAGAACTATG    |                          |
| 28Rpb1F2                                | GATTGGTGAAAGCCATGGAGGA    |                          |
| 28Rpb1SF3                               | GTCGGTTAGTTTGTGACT        |                          |
| 28Rpb1F5                                | GTCCATGTCCCAGAATGCA       |                          |
| 28Rpb1SF6                               | GTATGCGTTGTTCCAAACT       |                          |
| 28Rpb1SF7                               | GACATTGACCATGGGT          |                          |
| 28Rpb1R0                                |                           | GACCGTCAGAAGCCAGTAGTTG   |
| 28Rpb1R1                                |                           | GACACCAGAGTGTCTCCGAG     |
| 28Rpb1R2                                |                           | CAACTCTCCTCGACCTGAACTA   |
| 28Rpb1SR3                               |                           | CAGATATGCAGCACACATG      |
| 28Rpb1SR4                               |                           | CAACCATACATGCAAACGAG     |
| 28Rpb1R5                                |                           | ACGCACCTCTTGATGTTGA      |
| 28Rpb1R6                                |                           | CATTGCATGTGGAGTACCAAG    |
| 28Rpb1R8                                |                           | CTCGAAGAGGTAGGTGGCATT    |
| 28Rpb1R9                                |                           | GAAGCTGACCCTTTCCAAG      |
| <b><i>Malawimonas jakobiformis</i></b>  |                           |                          |
| MjakRpb1SF1                             | GATGATGAAGCACAGCCGCG      |                          |

MjakRpb1PCRF1  
MjakRpb1SF2  
MjakRpb1SF3  
MjakRpb1SF4  
MjakRpb1DSR1  
MjakRpb1GSR2

CGTGTGCTTCCGTACTCCACC  
CCCAAGCCGGCTATTCTCAAGCC  
GATGATTGCTTGTGTCGGCC  
CCGCATCGACGTGCGTGTCGG

GCTTCCGTACTCCACCTTCCG  
CGACCGAGCGCGATGAAGTG

---

*'Malawimonas californiana'*

47Rpb1SF1  
47Rpb1SF2  
47Rpb1SF5  
47Rpb1SF6  
47Rpb1SF7  
47Rpb1SR1  
47Rpb1SR2

GGAACGTGCAGCCCAAGATT  
CACATTGATGGAAACGTTCGAGA  
CTGCATCTCGATTACGGATAC  
CATGTTGCCCCATCGCGTT  
CACGCGTTTTTCATGAATGCT

CATGGAATGCGATATTGTGCCT  
GGCAGAGATTGAGGAGATT
